# Supplementary material for: Structural characterization and hepatoprotective activity of an acidic polysaccharide from Ganoderma lucidum
Source: PubMed Central journal article supplement — Food Chem X. 2022 Jan 3;13:100204. doi: 10.1016/j.fochx.2022.100204 (PMC9039936; doi:10.1016/j.fochx.2022.100204), 2022-01-03
Supplement: mmc1.pdf [file mmc1.pdf]

## **Supporting Information**

### **Structural characterization and hepatoprotective activity of an acidic polysaccharide from *Ganoderma lucidum***

Shaodan Chen, Xiaoying Guan, Tianqiao Yong, Xiong Gao, Chun Xiao, Yizhen Xie,  
Diling Chen, Huiping Hu, Qingping Wu\*

Guangdong Provincial Key Laboratory of Microbial Safety and Health,  
State Key Laboratory of Applied Microbiology Southern China,  
Institute of Microbiology, Guangdong Academy of Sciences, Guangzhou 510070, P. R.  
China

Correspondence to:

Prof. Qingping Wu, State Key Laboratory of Applied Microbiology Southern China,  
Institute of Microbiology, Guangdong Academy of Sciences, No. 100 Xianlie Middle  
Rd, Guangzhou, P. R. China; E-mail: wuqp203@163.com.

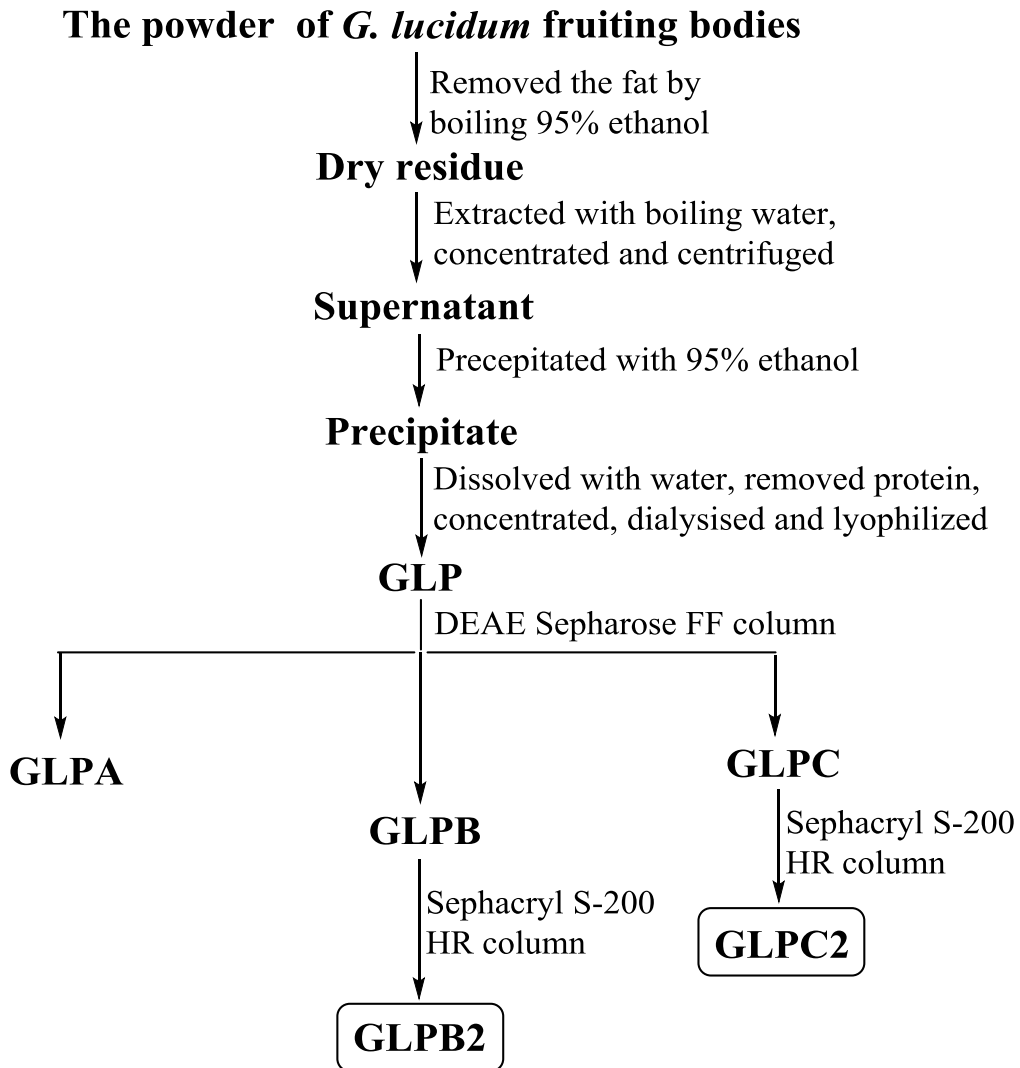

**Fig. S1.** Flow chart representative of the extraction and purification processes of GLP and GLPB2, GLPC2 from the fruiting body of *G. lucidum*

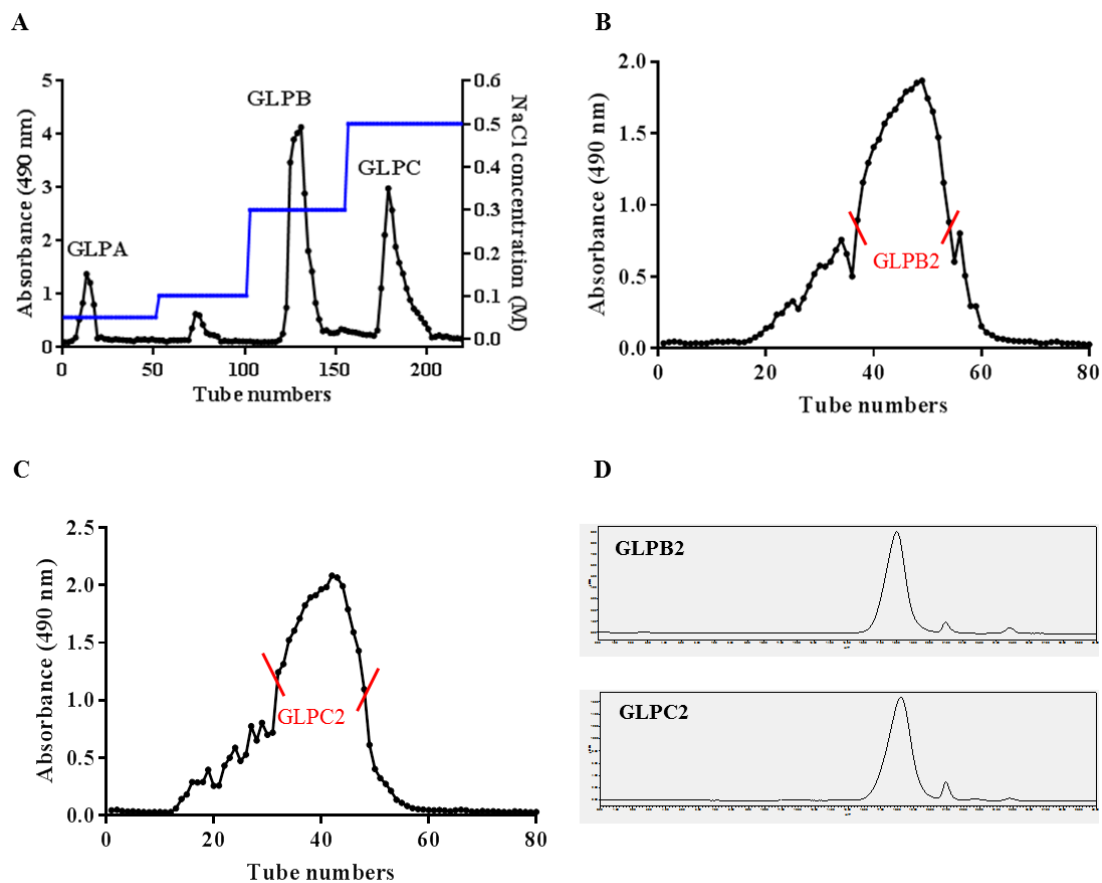

**Fig. S2.** Stepwise elution profiles of GLPB and GLPC on DEAE-Sepharose FF column from GLP (A); Elution profiles of GLPB2 (B) and GLPC2 (C) on Sephacryl S-200 HR column; HPGPC of GLPB2 and GLPC2 (D).

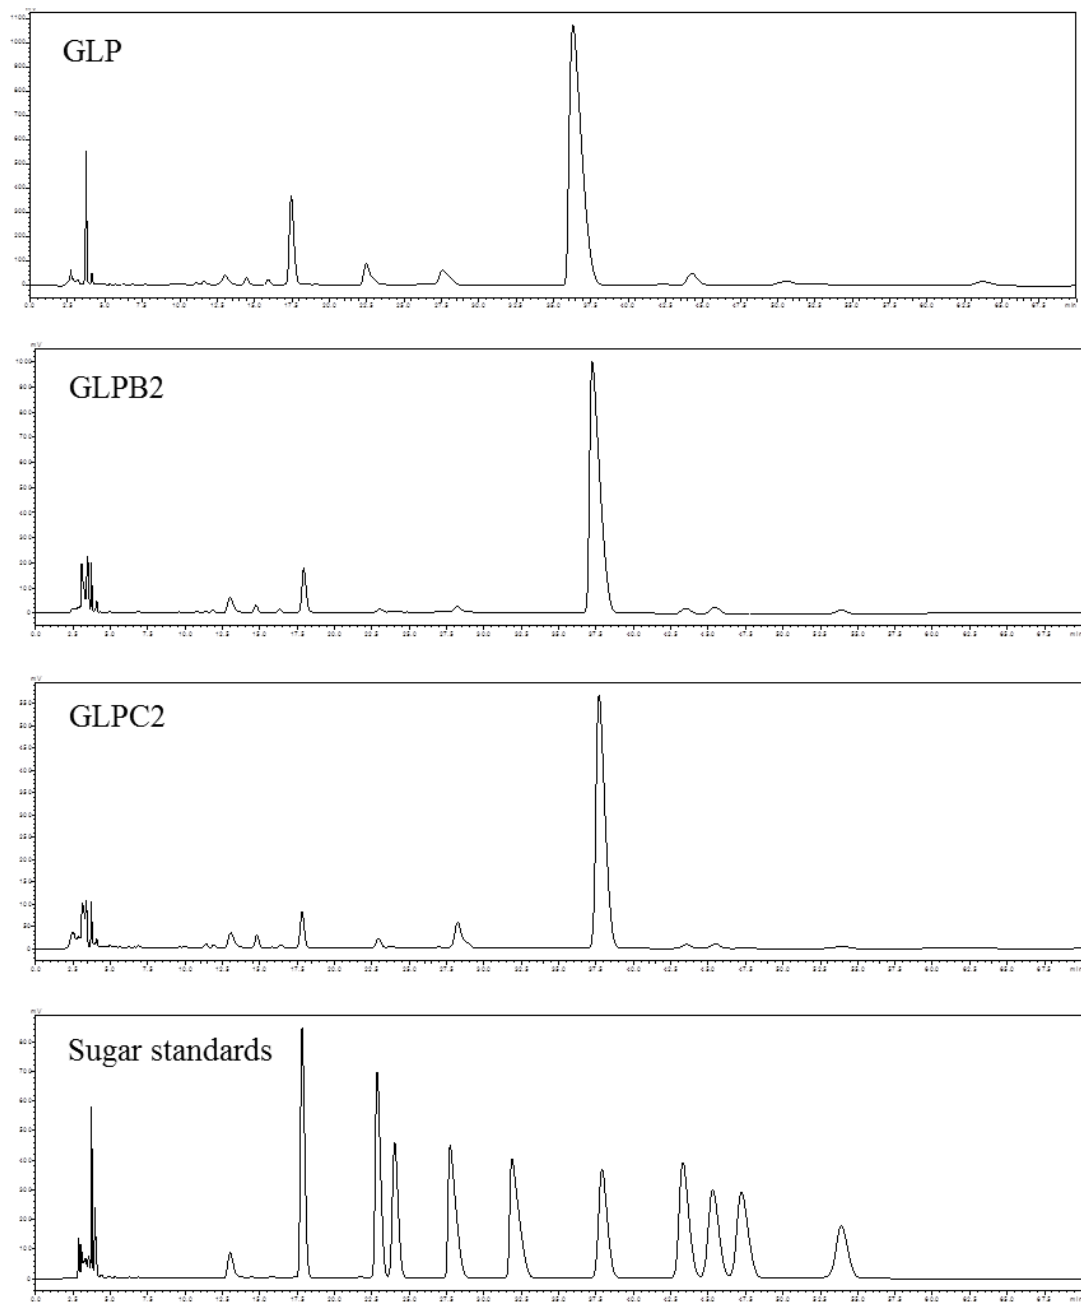

**Fig.S3** HPLC profiles of GLPB2, GLPC2 and standard monosaccharides

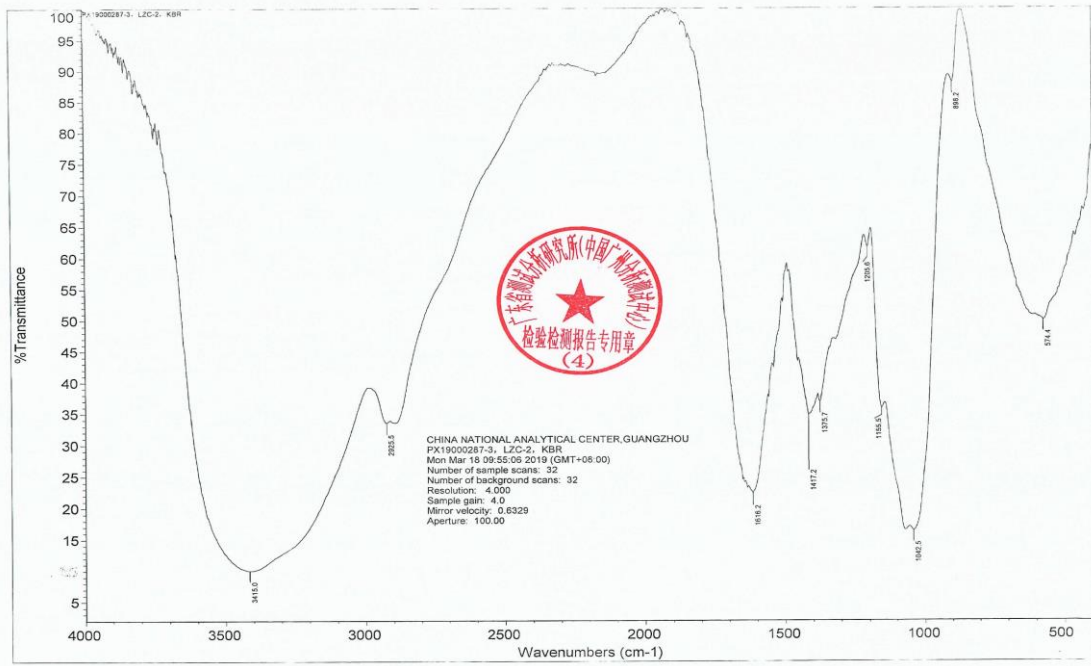

Fig.S4 IR spectrum of GLPC2

Table S1 GC–MS data for methylation analysis of GLPC2 and GLPC2R

| Methylated sugar           | Linkage types   | Molar ratios |        | Mass Fragments ( <i>m/z</i> )                      |
|----------------------------|-----------------|--------------|--------|----------------------------------------------------|
|                            |                 | GLPC2        | GLPC2R |                                                    |
| 2,3,4,6- <i>O</i> -Me-Glcp | D-Glc-(1→       | 1            | 1      | 59, 71, 87, 101, 129, 145, 173, 205                |
| 2,4,6- <i>O</i> -Me-Glcp   | →3)-D-Glc-(1→   | 2            | 2      | 71, 87, 99, 101, 117, 129, 131, 159, 161, 189, 233 |
| 2,3,6- <i>O</i> -Me-Glcp   | →4)-D-Glc-(1→   | 3            | 4      | 59, 71, 87, 99, 117, 129, 131, 159, 161, 189, 233  |
| 2,3,4- <i>O</i> -Me-Glcp   | →6)-D-Glc-(1→   | 2            | 2      | 59, 71, 87, 99, 101, 117, 129, 161, 189, 233       |
| 2,4- <i>O</i> -Me-Glcp     | →3,6)-D-Glc-(1→ | 1            | 1      | 59, 71, 87, 99, 101, 117, 129, 189, 233            |
